# Supplementary material for: A new class of “all-metal” aromatic hydrido-bridged binary coinage metal heterocycles. A DFT study
Source: Royal Society of Chemistry journal article supplement (doi:10.1039/b617158c), 2007-01-01
Supplement: b617158c.pdf [file b617158c.pdf]

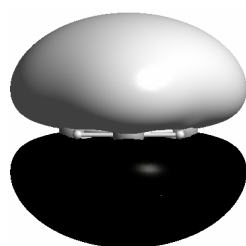

**LUMO**

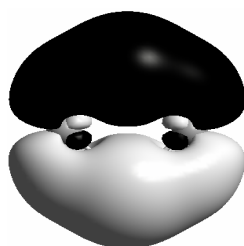

**HOMO**

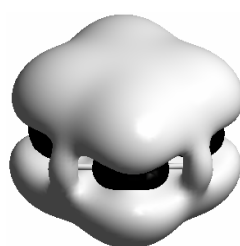

**HOMO-11**

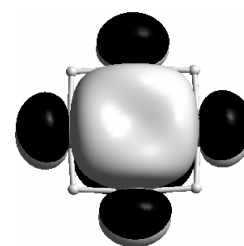

**HOMO-17**

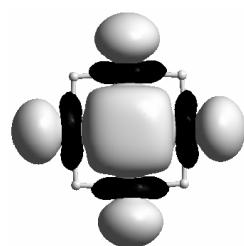

**HOMO-19**

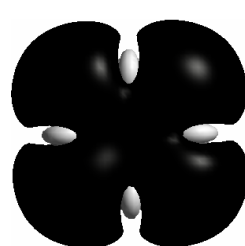

**HOMO-23**

**5**

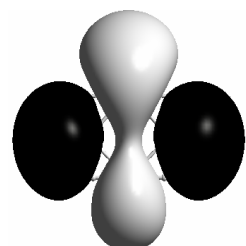

**LUMO**

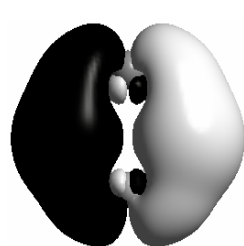

**HOMO**

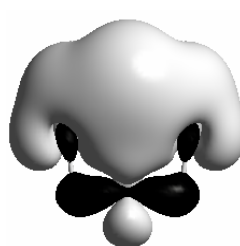

**HOMO-16**

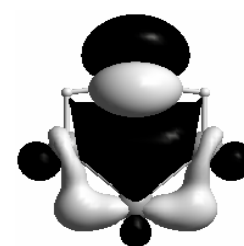

**HOMO-20**

**6**

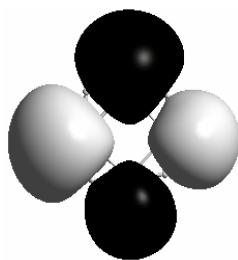

**LUMO**

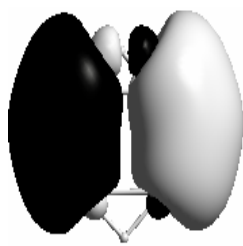

**HOMO**

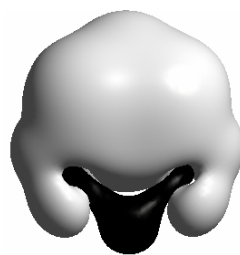

**HOMO-12**

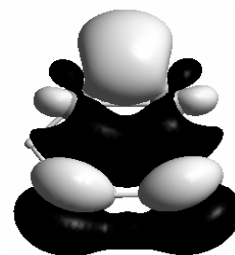

**HOMO-18**

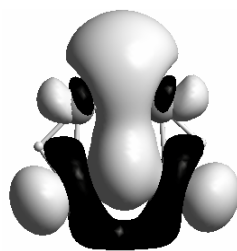

**HOMO-20**

7

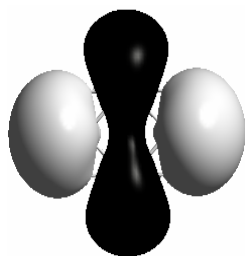

**LUMO**

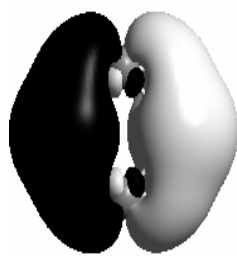

**HOMO**

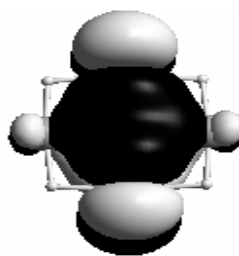

**HOMO-18**

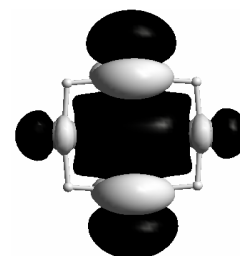

**HOMO-19**

8

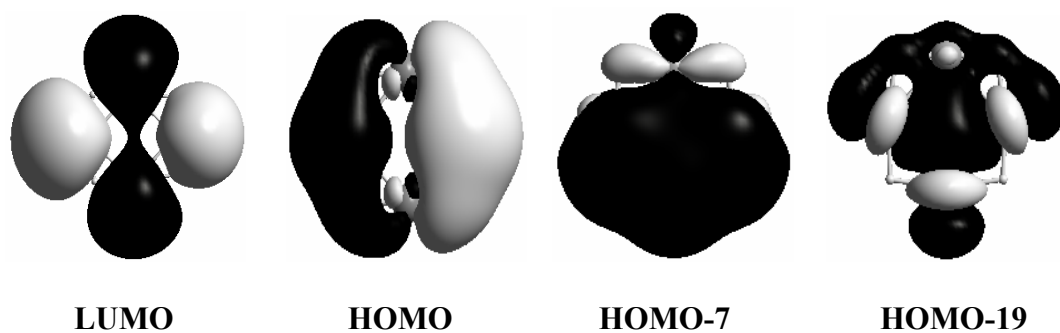

9

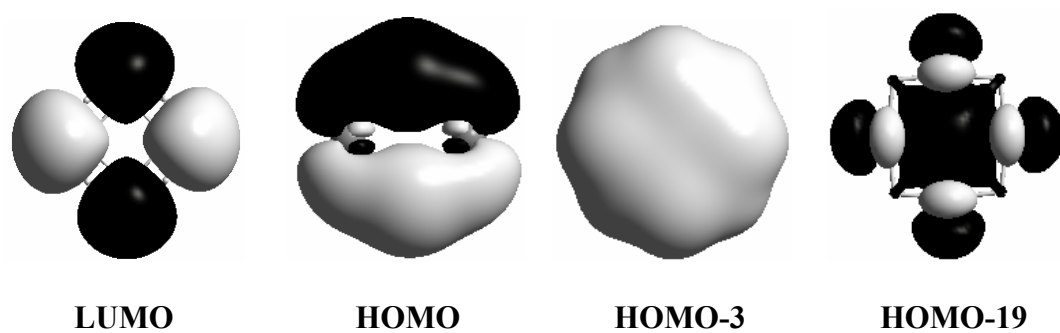

10

Figure S1

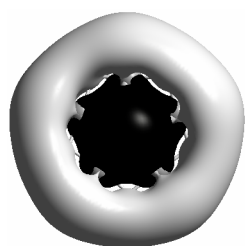

**LUMO**

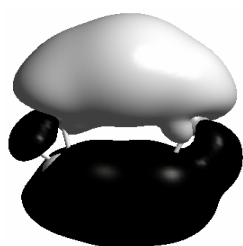

**HOMO**

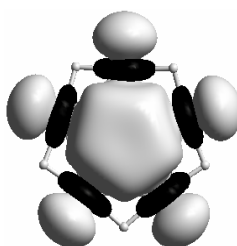

**HOMO-22**

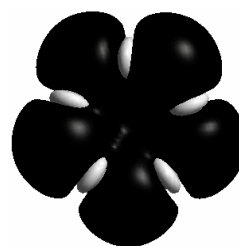

**HOMO-29**

**11**

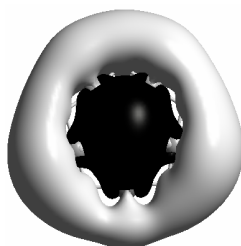

**LUMO**

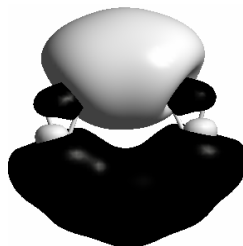

**HOMO**

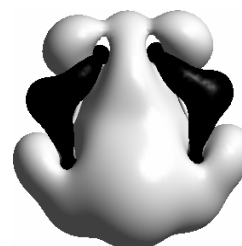

**HOMO-19**

**12**

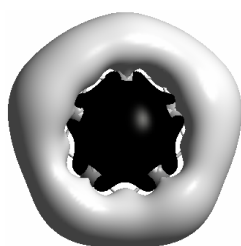

**LUMO**

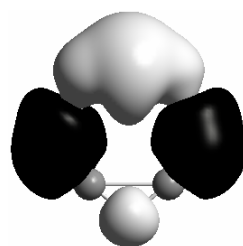

**HOMO**

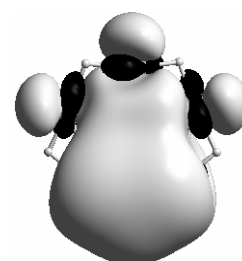

**HOMO-15**

**13**

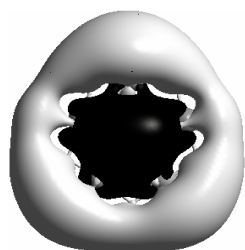

**LUMO**

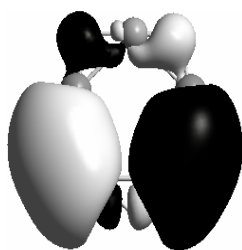

**HOMO**

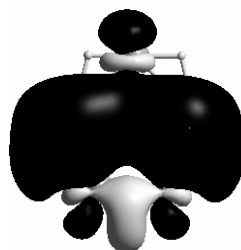

**HOMO-15**

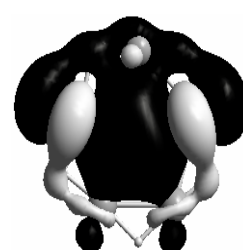

**HOMO-22**

**14**

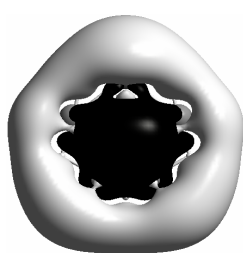

**LUMO**

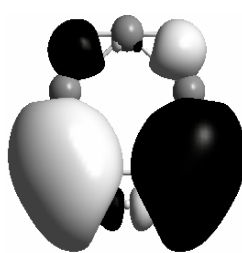

**HOMO**

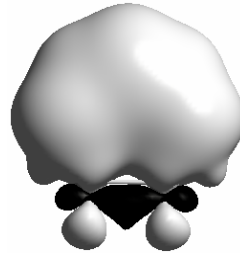

**HOMO-11**

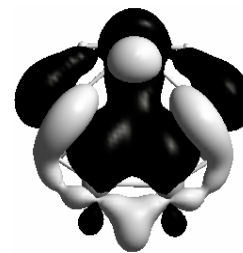

**HOMO-21**

**15**

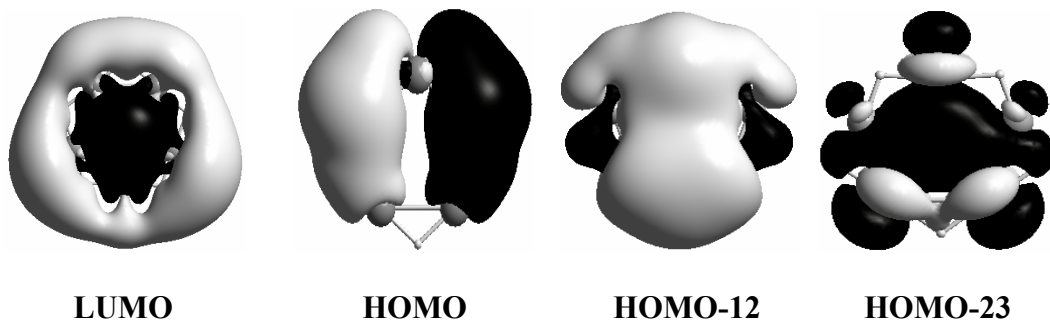

16

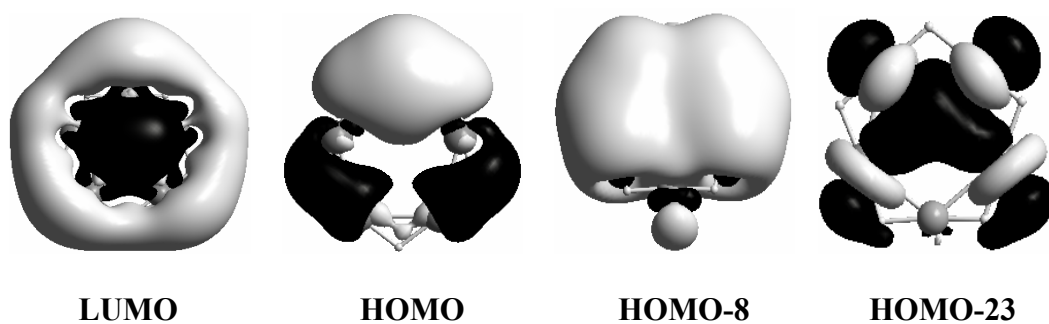

17

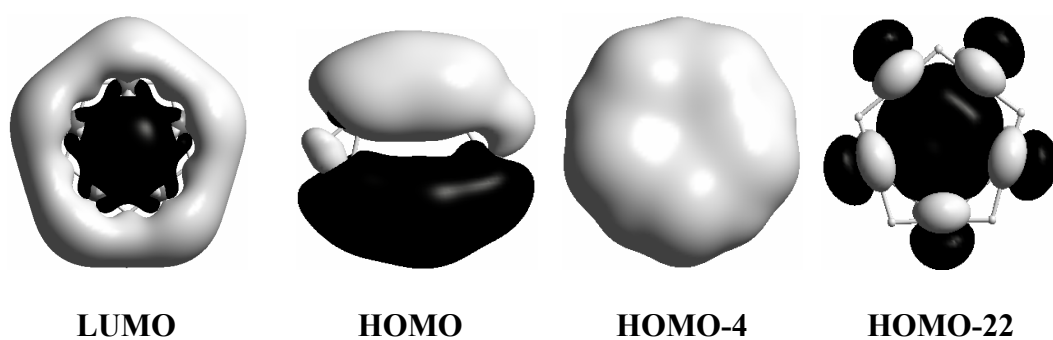

18

Figure S2

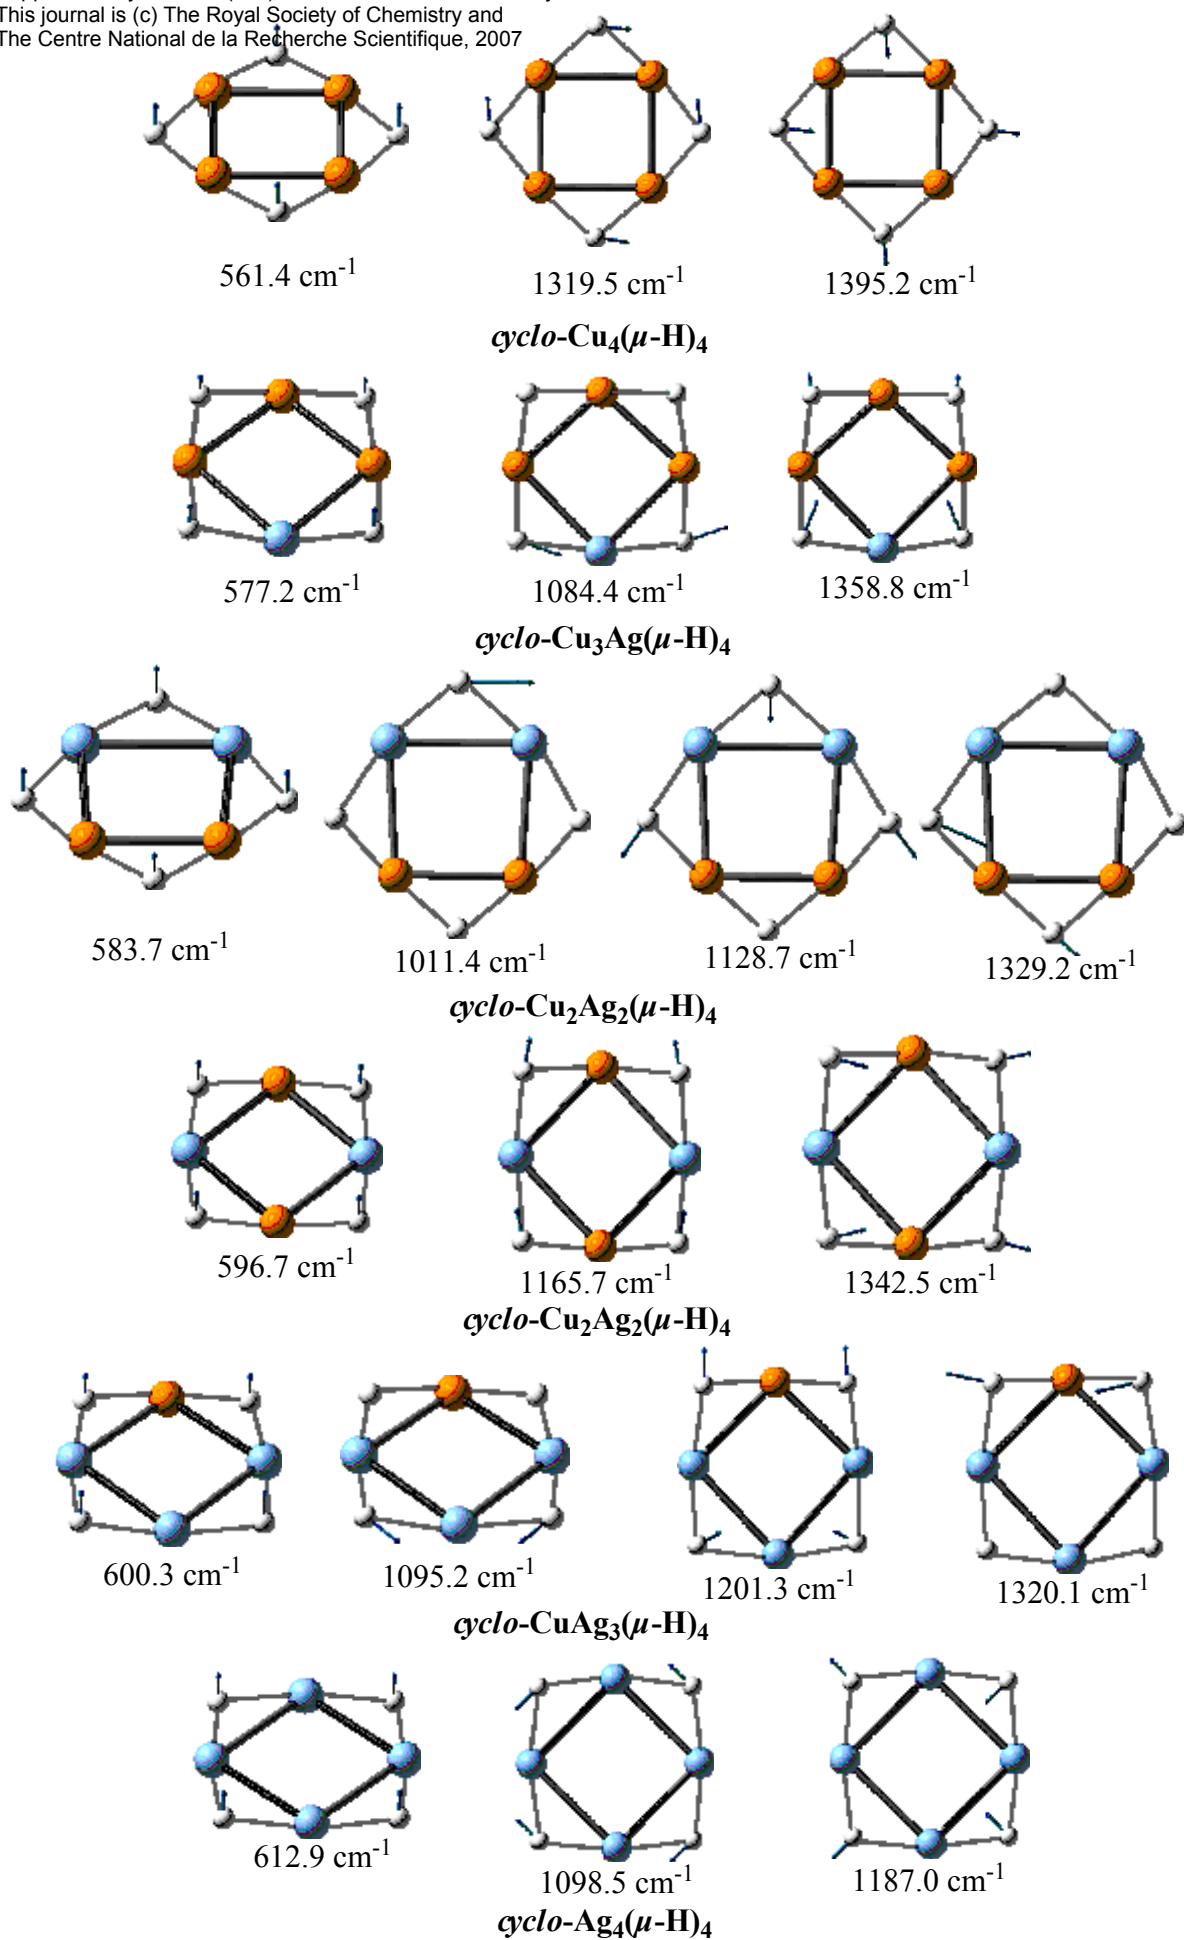

Figure S3

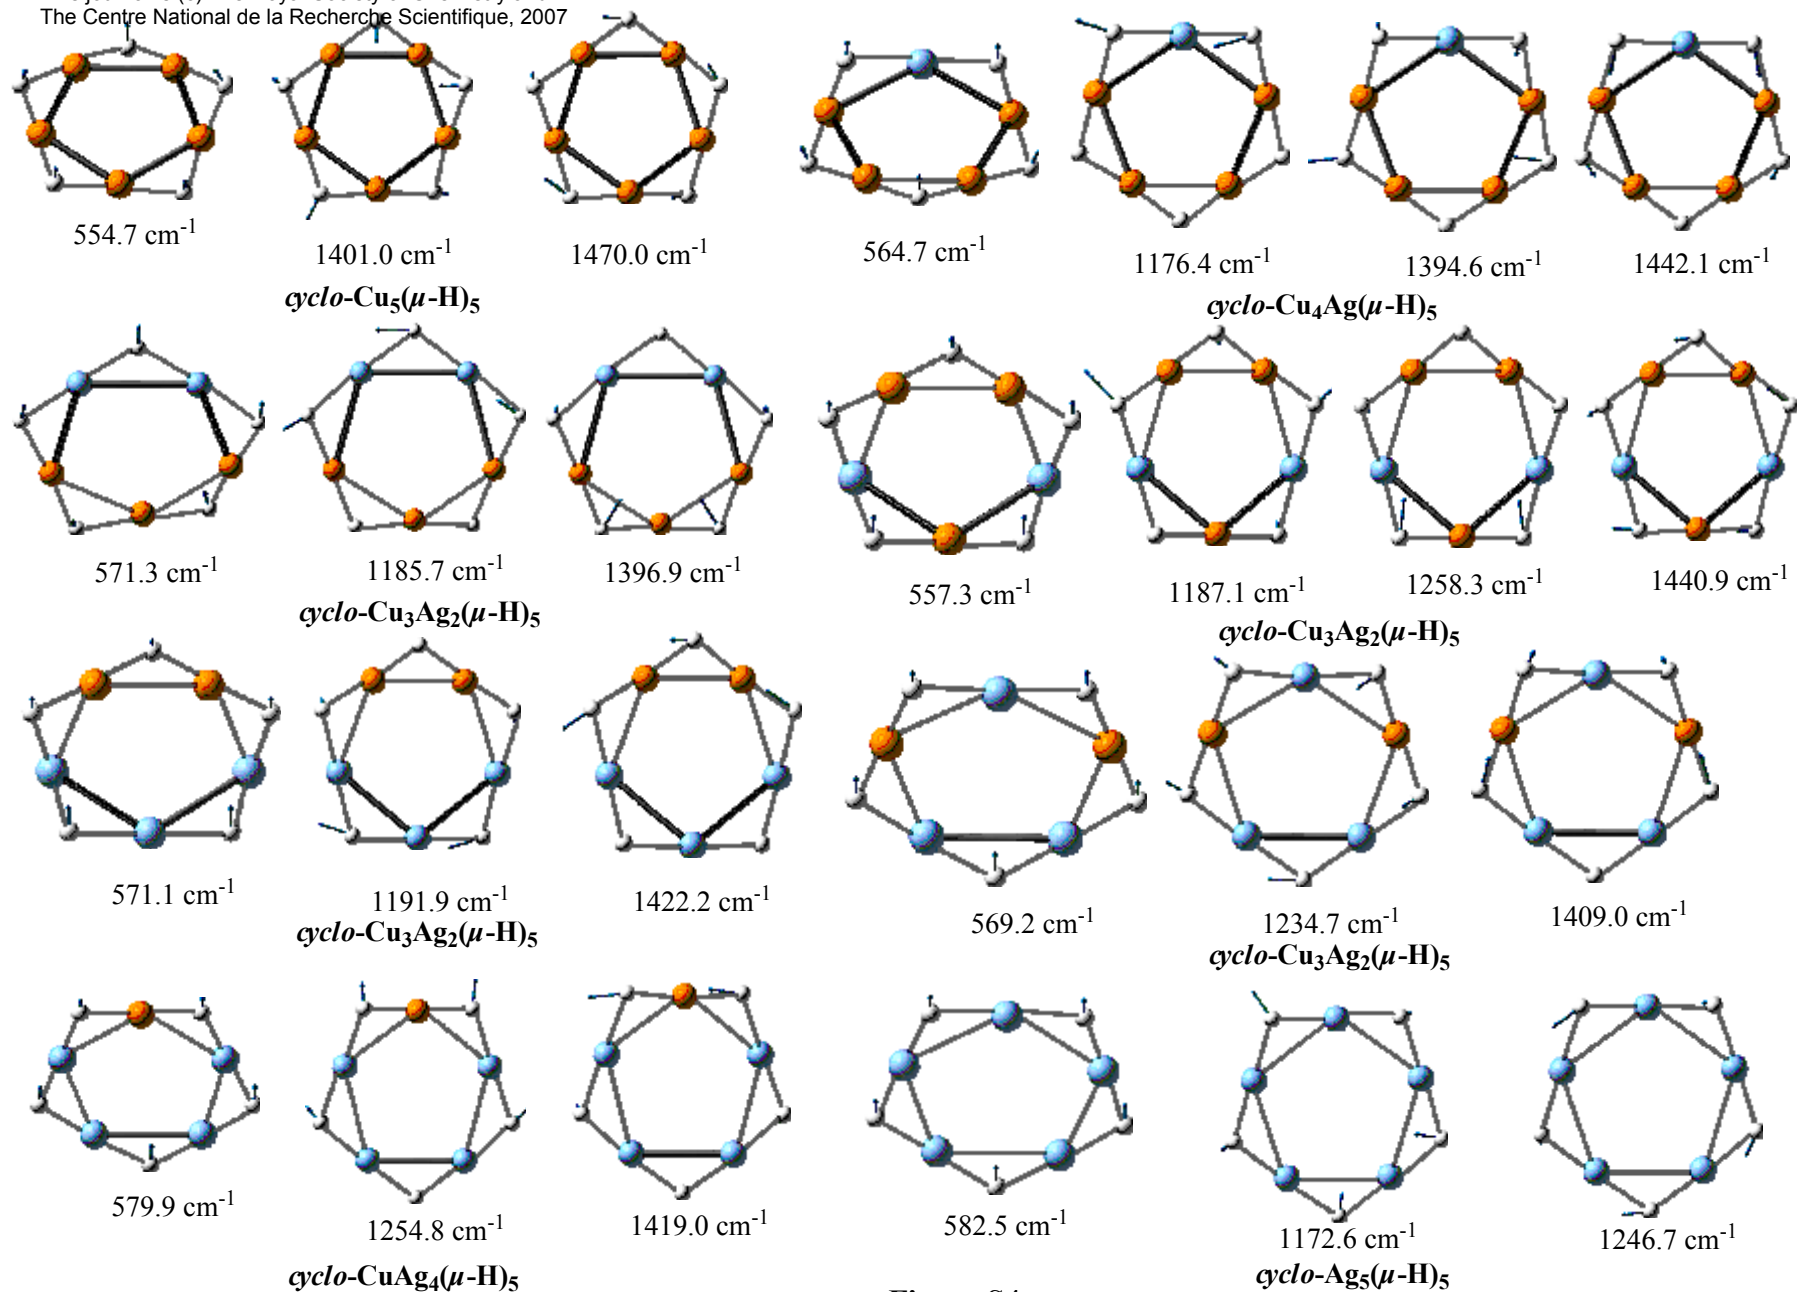

Figure S4



**Table S1** The most intense unscaled vibrational frequencies and the IR intensities computed at the b3lyp/6-31G(d,p)∪lanl2dz(Ag) level.

| Species   | Frequency (cm <sup>-1</sup> ) | Intensity (KMmol <sup>-1</sup> ) |
|-----------|-------------------------------|----------------------------------|
| <b>1</b>  | 559                           | 0.33                             |
|           | 1035                          | 1.00                             |
|           | 1294                          | 0.57                             |
| <b>2</b>  | 546                           | 0.25                             |
|           | 722                           | 0.38                             |
|           | 905                           | 1.00                             |
|           | 1251                          | 0.60                             |
| <b>3</b>  | 546                           | 0.25                             |
|           | 722                           | 0.38                             |
|           | 905                           | 1.00                             |
|           | 1251                          | 0.60                             |
| <b>4</b>  | 536                           | 0.26                             |
|           | 846                           | 1.00                             |
|           | 1075                          | 0.33                             |
| <b>5</b>  | 561                           | 0.42                             |
|           | 1320                          | 0.56                             |
|           | 1395                          | 1.00                             |
| <b>6</b>  | 577                           | 0.31                             |
|           | 1084                          | 0.42                             |
| <b>7</b>  | 1359                          | 1.00                             |
|           | 584                           | 0.43                             |
|           | 1011                          | 0.71                             |
| <b>8</b>  | 1129                          | 0.92                             |
|           | 1329                          | 1.00                             |
|           | 597                           | 0.23                             |
|           | 1168                          | 1.00                             |
| <b>9</b>  | 1342                          | 0.88                             |
|           | 600                           | 0.42                             |
|           | 1095                          | 0.99                             |
| <b>10</b> | 1201                          | 0.94                             |
|           | 1320                          | 1.00                             |
|           | 613                           | 0.31                             |
|           | 1100                          | 1.00                             |
| <b>11</b> | 1187                          | 0.56                             |
|           | 555                           | 0.39                             |
|           | 1404                          | 0.44                             |
| <b>12</b> | 1470                          | 1.00                             |
|           | 565                           | 0.35                             |
|           | 1395                          | 0.50                             |
|           | 1442                          | 1.00                             |
| <b>13</b> | 571                           | 0.49                             |
|           | 1186                          | 1.00                             |
|           | 1397                          | 0.84                             |
|           | 1419                          | 0.67                             |

|           |      |      |
|-----------|------|------|
| <b>14</b> | 557  | 0.33 |
|           | 1258 | 0.37 |
|           | 1387 | 0.41 |
|           | 1441 | 1.00 |
| <b>15</b> | 571  | 0.47 |
|           | 1192 | 0.91 |
|           | 1267 | 0.58 |
|           | 1442 | 1.00 |
| <b>16</b> | 569  | 0.31 |
|           | 1235 | 1.00 |
|           | 1409 | 0.89 |
| <b>17</b> | 580  | 0.45 |
|           | 1191 | 0.55 |
|           | 1255 | 1.00 |
|           | 1419 | 0.76 |
| <b>18</b> | 583  | 0.26 |
|           | 1173 | 0.24 |
|           | 1249 | 1.00 |
